# Supplementary material for: Deviations of the immune cell landscape between healthy liver and hepatocellular carcinoma
Source: PubMed Central journal article supplement (PMC5906687; doi:10.1038/s41598-018-24437-5), 2018-04-18
Supplement: 41598_2018_24437_MOESM1_ESM.pdf [file 41598_2018_24437_MOESM1_ESM.pdf]

Supplementary information to the manuscript:

**Deviations of the immune cell landscape between healthy liver and hepatocellular carcinoma**

Nataliya Rohr-Udilova<sup>1\*</sup>, Florian Klinglmüller<sup>2</sup>, Rolf Schulte-Hermann<sup>3</sup>, Judith Stift<sup>4</sup>,  
Merima Herac<sup>4</sup>, Martina Salzmann<sup>5</sup>, Francesca Finotello<sup>6</sup>, Gerald Timelthaler<sup>4</sup>,  
Georg Oberhuber<sup>3</sup>, Matthias Pinter<sup>1</sup>, Thomas Reiberger<sup>1</sup>, Erika Jensen-Jarolim<sup>5,7</sup>,  
Robert Eferl<sup>4</sup>, Michael Trauner<sup>1</sup>

<sup>1</sup>Division of Gastroenterology and Hepatology, Department of Internal Medicine III,  
Medical University of Vienna, Waehringer Guertel 18-20, A-1090 Vienna, Austria;  
[nataliya.rohr-udilova@meduniwien.ac.at](mailto:nataliya.rohr-udilova@meduniwien.ac.at)

<sup>2</sup>Centre for Medical Statistics, Informatics and Intelligent Systems, Medical University  
of Vienna, Spitalgasse 23, A-1090 Vienna Austria

<sup>3</sup>Institute of Cancer Research, Internal Medicine I, Medical University of Vienna  
and Comprehensive Cancer Center (CCC), Borschkegasse 8a, A-1090 Vienna, Austria

<sup>4</sup>Clinical Institute of Pathology, Medical University of Vienna, Waehringer Guertel  
18-20, A-1090 Vienna, Austria

<sup>5</sup>Institute of Pathophysiology and Allergy Research, Center of Pathophysiology,  
Infectiology and Immunology, Medical University of Vienna, Vienna, Austria

<sup>6</sup>Division of Bioinformatics, Biocenter, Medical University of Innsbruck, Innrain 80-82, A-  
6020 Innsbruck, Austria

<sup>7</sup>Comparative Medicine, The Interuniversity Messerli Research Institute of the University  
of Veterinary Medicine Vienna, Medical University Vienna and University Vienna, Vienna,  
Austria

\* *Correspondence to:* Dr. Nataliya Rohr-Udilova

Division of Gastroenterology and Hepatology,

Department of Internal Medicine III,

Medical University of Vienna

Waehringer Guertel 18-20

A-1090 Vienna, Austria

Tel.: +43 1 40400 47440

Fax: + 43 1 40400 47350

e-mail: [nataliya.rohr-udilova@meduniwien.ac.at](mailto:nataliya.rohr-udilova@meduniwien.ac.at)

Supplementary Table 1. Pearson's correlation of CIBERSORT and EPIC deconvolution results.

| <b>Cell type</b>               | <b>Correlation</b> | <b>p-value</b> |
|--------------------------------|--------------------|----------------|
| <b>B cells</b>                 | 0.52               | <2e-16         |
| <b>Macrophages</b>             | 0.22               | 1.60e-05       |
| <b>NK cells</b>                | 0.23               | 3.70e-06       |
| <b>CD8<sup>+</sup> T cells</b> | 0.21               | 3.60e-05       |

Supplementary Table 2. Comparison of immune cell abundance in HCC calculated by xCell and CIBERSORT 3 algorithms.

| Cell type /parameter | xCell score, mean+- SD |                             |                      | Pearson correlation between xCell and CIBERSORT |                   | Qualitative consistency<br>xCell vs CIBERSORT |
|----------------------|------------------------|-----------------------------|----------------------|-------------------------------------------------|-------------------|-----------------------------------------------|
|                      | HCC tissue             | Tumor adjacent tissue (TaT) | p-value (HCC vs TaT) | correlation coefficient                         | p-value           |                                               |
| Immunoscore          | 0.42+0.10              | 0.54+0.09                   | $4 \cdot 10^{-20}$   | n.d.                                            | n.d.              | (yes)                                         |
| Plasma cells         | 0.025+0.026            | 0.0047+0.011                | $10^{-11}$           | 0.42                                            | $<10^{-16}$       | yes                                           |
| T cells CD8+         | 0.091+0.048            | 0.11+0.06                   | $5 \cdot 10^{-5}$    | 0.53                                            | $<10^{-16}$       | yes                                           |
| Tregs                | 0.16+ 0.06             | 0.14+ 0.06                  | $8 \cdot 10^{-3}$    | -0.19                                           | 0.00013           | no                                            |
| Total Macrophages    | 0.038+0.028            | 0.012+0.015                 | $2 \cdot 10^{-14}$   | n.d.                                            | n.d.              | yes                                           |
| M1 macrophages       | 0.0023+0.0049          | 0.00034+0.00111             | $4 \cdot 10^{-4}$    | 0.02                                            | 0.7               | (yes)                                         |
| M2 macrophages       | 0.11+0.03              | 0.096+0.039                 | $10^{-3}$            | 0.29                                            | $4 \cdot 10^{-9}$ | yes                                           |

Supplementary Table 3. Impact of the viral status in HCC patients on CIBERSORT immune cell frequencies.

| CIBERSORT results            | Viral status             |              |                          |              |                          |              | ANOVA p-values<br>(between the groups) |
|------------------------------|--------------------------|--------------|--------------------------|--------------|--------------------------|--------------|----------------------------------------|
|                              | negative (n=3)           |              | HCV (n=57)               |              | HBV (n=17)               |              |                                        |
|                              | mean                     | stdev        | mean                     | stdev        | mean                     | stdev        |                                        |
| B_cells_naive                | 0,026                    | 0,028        | 0,048                    | 0,039        | 0,040                    | 0,041        | 0,539                                  |
| B_cells_memory               | 0,011                    | 0,018        | 0,009                    | 0,020        | 0,012                    | 0,019        | 0,859                                  |
| Plasma_cells                 | 0,006                    | 0,010        | 0,006                    | 0,025        | 0,008                    | 0,025        | 0,980                                  |
| T_cells_CD8                  | 0,099                    | 0,022        | 0,117                    | 0,081        | 0,091                    | 0,056        | 0,442                                  |
| T_cells_CD4_memory_resting   | 0,247                    | 0,047        | 0,222                    | 0,106        | 0,237                    | 0,052        | 0,793                                  |
| T_cells_CD4_memory_activated | 0,028                    | 0,016        | 0,023                    | 0,030        | 0,012                    | 0,020        | 0,315                                  |
| T_cells_follicular_helper    | 0,015                    | 0,013        | 0,047                    | 0,046        | 0,039                    | 0,051        | 0,472                                  |
| Tregs                        | 0,027                    | 0,046        | 0,020                    | 0,029        | 0,017                    | 0,028        | 0,850                                  |
| T_cells_gamma_delta          | 0,000                    | 0,000        | 0,001                    | 0,005        | 0,000                    | 0,000        | 0,843                                  |
| NK_cells_resting             | 0,035                    | 0,037        | 0,018                    | 0,035        | 0,026                    | 0,038        | 0,570                                  |
| NK_cells_activated           | 0,040                    | 0,042        | 0,044                    | 0,043        | 0,029                    | 0,033        | 0,443                                  |
| Monocytes                    | 0,000                    | 0,000        | 0,005                    | 0,010        | 0,003                    | 0,008        | 0,609                                  |
| Macrophages_M0               | 0,048                    | 0,035        | 0,029                    | 0,039        | 0,022                    | 0,030        | 0,514                                  |
| Macrophages_M1               | 0,072                    | 0,034        | 0,110                    | 0,040        | 0,105                    | 0,033        | 0,244                                  |
| Macrophages_M2               | 0,126                    | 0,043        | 0,145                    | 0,084        | 0,157                    | 0,068        | 0,787                                  |
| Dendritic_cells_resting      | 0,022                    | 0,027        | 0,022                    | 0,030        | 0,034                    | 0,035        | 0,422                                  |
| Dendritic_cells_activated    | 0,000                    | 0,000        | 0,000                    | 0,001        | 0,000                    | 0,000        | 0,843                                  |
| Mast_cells_resting           | 0,095                    | 0,082        | 0,080                    | 0,059        | 0,107                    | 0,071        | 0,280                                  |
| <b>Mast_cells_activated</b>  | <b>0,051<sup>#</sup></b> | <b>0,089</b> | <b>0,002<sup>*</sup></b> | <b>0,016</b> | <b>0,005<sup>#</sup></b> | <b>0,016</b> | <b>0,001</b>                           |
| Eosinophils                  | 0,000                    | 0,000        | 0,001                    | 0,004        | 0,000                    | 0,000        | 0,734                                  |
| Neutrophils                  | 0,052                    | 0,029        | 0,052                    | 0,035        | 0,057                    | 0,037        | 0,882                                  |
| P_value                      | 0,173                    | 0,146        | 0,122                    | 0,174        | 0,142                    | 0,228        | 0,844                                  |
| total_Tcells                 | 0,514                    | 0,051        | 0,472                    | 0,078        | 0,450                    | 0,085        | 0,363                                  |
| total_Bcells                 | 0,037                    | 0,025        | 0,056                    | 0,036        | 0,052                    | 0,039        | 0,617                                  |
| total_NK                     | 0,075                    | 0,009        | 0,062                    | 0,042        | 0,055                    | 0,034        | 0,695                                  |
| total_Mast_cells             | 0,146                    | 0,008        | 0,082                    | 0,058        | 0,112                    | 0,065        | 0,051                                  |
| total_MF                     | 0,247                    | 0,038        | 0,284                    | 0,084        | 0,283                    | 0,058        | 0,718                                  |
| total_DC                     | 0,022                    | 0,027        | 0,023                    | 0,030        | 0,034                    | 0,035        | 0,429                                  |
| M1_M2_ratio                  | 0,716                    | 0,633        | 1,033                    | 0,946        | 0,840                    | 0,491        | 0,625                                  |

Viral status was available for a subset of 78 patients. Of these, n= 57 were HCV positive, n=17 were HBV positive, n=3 were HBV/HCV negative and n=1 was positive for both HBV/HCV . Double positive patient was excluded from analysis. Means and standard deviations were calculated for each group.

\* p=0.001 vs HCV after Bonferroni correction; # p=0.003 vs HBV after Bonferroni correction

Supplementary Table 4. Sample characteristics of healthy liver datasets.

| <b>Dataset</b>      | <b>Sex</b> | <b>Age,<br/>years</b> | <b>Condition</b>            | <b>Reference</b> |
|---------------------|------------|-----------------------|-----------------------------|------------------|
| <b>GSM372247</b>    | female     | 27                    | Healthy adult, sudden death | 33               |
| <b>GSM372248</b>    | female     | 29                    | Healthy adult, sudden death | 33               |
| <b>GSM372249</b>    | male       | 29                    | Healthy adult, sudden death | 33               |
| <b>GSM372599</b>    | female     | 48                    | Liver transplant            | 33               |
| <b>GSM372600</b>    | male       | 34                    | Liver transplant            | 33               |
| <b>GSM373314</b>    | male       | 53                    | Liver transplant            | 33               |
| <b>GSM373315</b>    | female     | 48                    | Liver transplant            | 33               |
| <b>GSM373324</b>    | female     | 47                    | Liver transplant            | 33               |
| <b>GSM35982</b>     | NA         | NA                    | Healthy liver               | 34               |
| <b>GSM155926</b>    | NA         | NA                    | Healthy liver               | 35,36            |
| <b>GSM155988</b>    | NA         | NA                    | Normal liver tissue         | 35,36            |
| <b>GSM176332</b>    | male       | NA                    | Normal liver tissue         | 35               |
| <b>GSM80730</b>     | female     | 39                    | Healthy adult, sudden death | 35,37            |
| <b>GSM319287</b>    | NA         | NA                    | Liver transplant            | 35,39            |
| <b>E-AFMX-11HL4</b> | male       | 29                    | Normal liver tissue         | 35,38            |
| <b>E-AFMX-11HL5</b> | Male       | NA                    | Normal liver tissue         | 35,38            |

Supplementary Table 5. Estimated absolute mast cell infiltration in HCC and TaT using “absolute score” feature of CIBERSORT.

|                     | HCC (n=183)  | TaT (n=65)    | p-value for means comparison by ANOVA |
|---------------------|--------------|---------------|---------------------------------------|
| Mast cells resting  | 0,029+0,031* | 0,046+0,039*  | 0,004                                 |
| Mast cell activated | 0,0063+0,014 | 0,0031+0,0077 | 0,522                                 |
| Mast cell total     | 0,035+0,028# | 0,049+0,035#  | 0,028                                 |

Only the datasets with  $p < 0.05$  of CIBERSORT calculations in “absolute score” mode were selected for analysis.

#, \* the corresponding TaT and HCC values differ significantly at  $p = 0.05$ .

Supplementary Table 6. Clinical characteristics of HCC patients used for immunohistochemical quantitation of mast cells in tumor and tumor adjacent tissues shown in Fig. 6C.

|                  | sex    | Age | AFP  | tumor size (cm) | tumor-grading | underlying disease | pM   | pN   | vascular invasion |
|------------------|--------|-----|------|-----------------|---------------|--------------------|------|------|-------------------|
| <b>Patient1</b>  | male   | 65  | n.a. | 10              | 3             | HCV                | 0    | NO   | 1                 |
| <b>Patient2</b>  | male   | 49  | 2,9  | 1,1             | 1             | HCV                | 0    | NO   | 0                 |
| <b>Patient3</b>  | male   | 55  | n.a. | 6               | 2             | HCV                | n.a. | n.a. | 0                 |
| <b>Patient4</b>  | female | 68  | 7,8  | 6               | 2             | HCV                | 0    | NO   | 0                 |
| <b>Patient5</b>  | male   | 55  | 4,4  | 1,1             | 2             | HCV                | 0    | NO   | 0                 |
| <b>Patient6</b>  | male   | 61  | 641  | 0,5             | 2             | HCV                | 0    | NO   | 0                 |
| <b>Patient7</b>  | male   | 50  | 85   | 0,5             | 2             | HBV+HCV            | 0    | NO   | 0                 |
| <b>Patient8</b>  | male   | 58  | 38,9 | 0,6             | 1             | HCV                | 0    | NO   | 0                 |
| <b>Patient9</b>  | male   | 58  | 22   | 2,2             | 2             | HCV                | 0    | NO   | 0                 |
| <b>Patient10</b> | male   | 65  | 8,2  | 2,4             | 2             | HCV                | 0    | NO   | 0                 |
| <b>mean</b>      |        | 58  | 101  | 3,0             |               |                    |      |      |                   |
| <b>stdev</b>     |        | 6   | 220  | 3,2             |               |                    |      |      |                   |

# Supplementary Figure 1

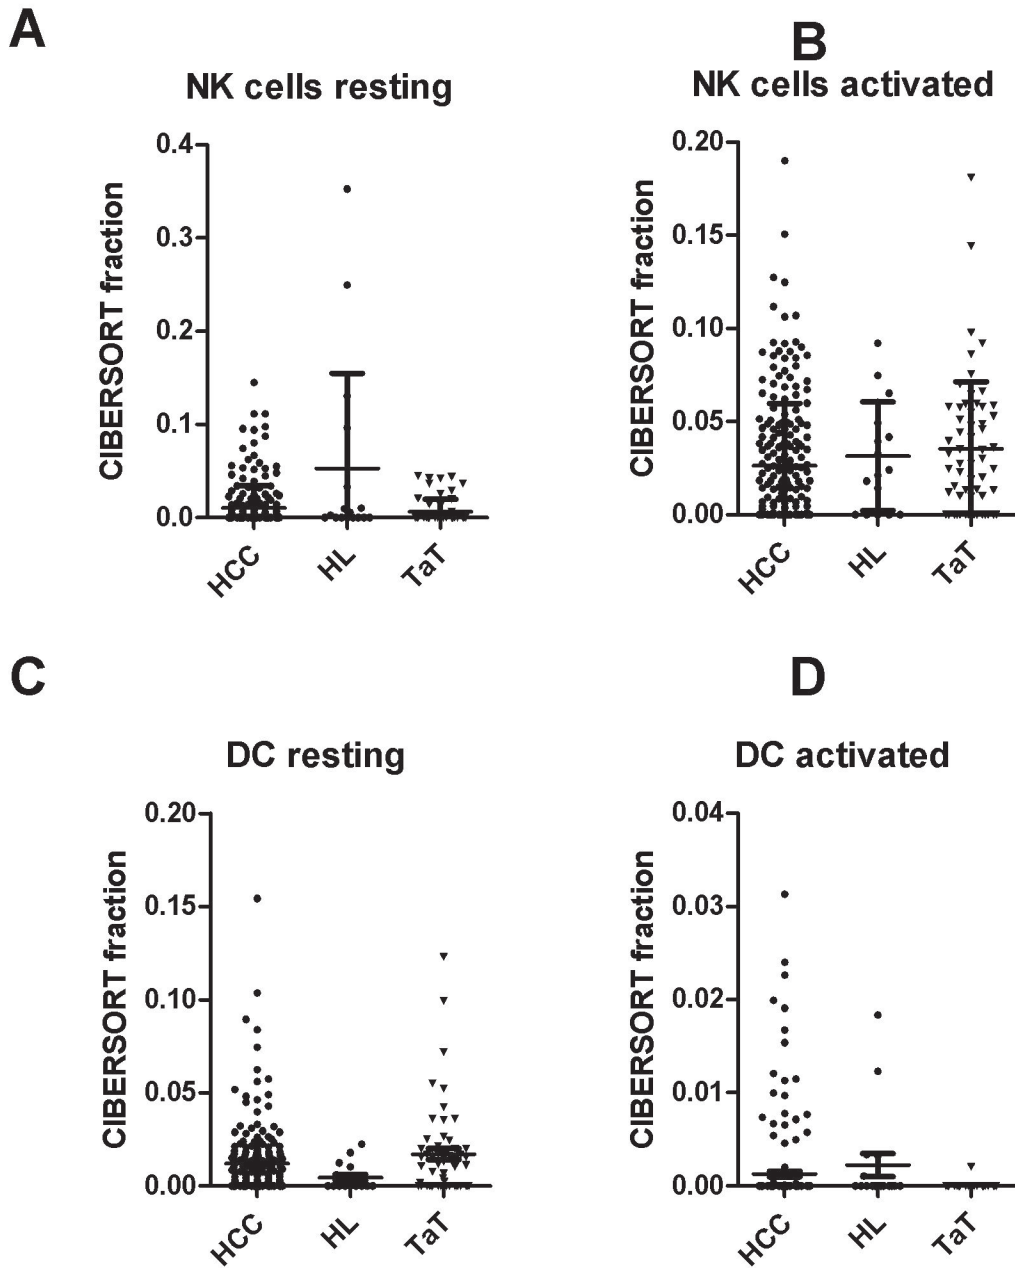

Supplementary Fig.1 . Natural Killer (NK) cells and dendritic cells (DC) in human HCC tumor tissue (HCC), adjacent tissue (TaT) and healthy liver (HL). CIBERSORT immune cell fractions were determined for each patient; each dot represents one patient. Mean values and standard deviations for each cell subset including resting NK cells (A), activated NK cells (B), resting dendritic cells (C) and activated dendritic cells (D) were calculated for each patient group and compared using one-way ANOVA. \*  $p < 0.05$ ; \*\*  $p < 0.01$



# Supplementary Fig. 2

|                              | Healthy liver<br>(n=17) |              | HCC tumor tissue<br>(n=258) |              | Tumor adjacent<br>tissue (n=46) |              |
|------------------------------|-------------------------|--------------|-----------------------------|--------------|---------------------------------|--------------|
|                              | MC<br>rest.             | MC<br>activ. | MC<br>rest.                 | MC<br>activ. | MC<br>rest.                     | MC<br>activ. |
| B_cells_naive                | ns                      | ns           | -0,11                       | ns           | -0,275                          | <u>0,352</u> |
| B_cells_memory               | ns                      | ns           | -0,13                       | 0,13         | ns                              | ns           |
| Plasma_cells                 | ns                      | -0,51        | -0,30                       | ns           | -0,322                          | ns           |
| T_cells_CD8                  | ns                      | ns           | ns                          | -0,15        | -0,285                          | ns           |
| T_cells_CD4_naive            | ns                      | ns           | ns                          | ns           | ns                              | ns           |
| T_cells_CD4_memory_resting   | ns                      | ns           | 0,14                        | ns           | ns                              | -0,384       |
| T_cells_CD4_memory_activated | ns                      | ns           | -0,26                       | ns           | ns                              | ns           |
| T_cells_follicular_helper    | ns                      | -0,47        | -0,41                       | 0,15         | -0,553                          | ns           |
| Tregs                        | ns                      | -0,50        | ns                          | ns           | -0,257                          | ns           |
| T_cells_gamma_delta          | ns                      | ns           | -0,19                       | 0,16         | ns                              | 0,323        |
| NK_cells_resting             | 0,56                    | -0,48        | ns                          | ns           | ns                              | ns           |
| NK_cells_activated           | ns                      | ns           | 0,21                        | ns           | ns                              | ns           |
| Monocytes                    | ns                      | 0,50         | 0,28                        | -0,19        | 0,343                           | ns           |
| Macrophages_M0               | ns                      | 0,52         | 0,42                        | -0,15        | 0,329                           | -0,263       |
| Macrophages_M1               | ns                      | ns           | 0,22                        | -0,164       | ns                              | 0,431        |
| Macrophages_M2               | ns                      | -0,51        | -0,288                      | 0,17         | ns                              | ns           |
| Dendritic_cells_resting      | ns                      | ns           |                             | -0,159       | -0,29                           | ns           |
| Dendritic_cells_activated    | ns                      | 0,59         | -0,232                      | 0,197        | ns                              | 0,386        |
| Eosinophils                  | ns                      | 0,60         | -0,347                      | 0,291        | -0,311                          | 0,438        |
| Neutrophils                  | ns                      | ns           | -0,21                       | 0,167        | ns                              | ns           |

**bold**

**bold and underscored**

ns

red

blue

p<0.05

p<0.01

no significant correlation

positive correlation ( $r^2 > 0$ )

negative correlation ( $r^2 < 0$ )

suppl. Fig.2. Pearson correlation coefficients between resting /activated mast cells and other immune cell populations in healthy livers, HCC tumor tissues and tumor adjacent tissues. Cell populations for each patient were calculated by CIBERSORT as described in Materials and Methods.
